# Supplementary material for: High-performance polydopamine and silver nanoparticle-modified MXene-based hydrogel flexible strain sensors for transfer-learning-assisted handwriting recognition and wrist-movement monitoring
Source: Royal Society of Chemistry journal article supplement (doi:10.1039/d5nr04094a), 2025-12-18
Supplement: d5nr04094a1.pdf [file d5nr04094a1.pdf]

## **Supporting Information**

### **High Performance Polydopamine and Silver Nanoparticles Modified MXene-Based Hydrogel Flexible Strain Sensors for Transfer-Learning Assisted Hand-Written Recognition and Wrist Movement Monitoring**

Jiaye Zhou<sup>a, b, 1</sup>, Shao yufan<sup>a, 1</sup>, Song Xuqing<sup>a, 1</sup>, Tianchi Chen<sup>a, \*</sup> and, Xiangning Lu <sup>a, \*</sup>

<sup>a</sup> School of Mechanical and Electrical Engineering, Jiangsu Normal University, Xuzhou 221000, China.

<sup>b</sup> Department of Electrical and Electronic Engineering, Southern University of Science and Technology, Shenzhen, Guangdong 518055, China

\* E-mail: ctc900112@163.com, lxnam89@163.com.

<sup>1</sup> These authors contribute equally to this article and should be considered as co-first authors.

## 1. Test detail

### 1.1 Sensing properties tests of the hydrogel strain sensor

Real-time resistance was recorded using a digital source meter (Keithley2450, Tektronix, Inc., USA). The resistance change can be calculated by the following formula:

$$\Delta R/R_0 = (R_t - R_0)/R_0 \times 100\% \quad (1)$$

Where  $R_0$  and  $R_t$  are the resistance without and with strain, respectively.

The strain sensor measurement factor is commonly used to evaluate the performance of strain sensors. The gauge factor (GF) is defined using the following equation:

$$GF = \Delta R/R_0 \times \varepsilon \quad (2)$$

Where  $\Delta R$  is the change of the resistance before and after tensile,  $R_0$  is the resistance before strain and  $\varepsilon$  is the strain of the hydrogel. Four sets of hydrogel samples with different concentrations were tested.

### 1.2 Mechanical properties tests of the hydrogel strain

The mechanical properties of hydrogels were tested with a P300 tensile tester (Dongguan Dongri Co., Ltd., China) at a speed of 50 mm/min. The modulus of elasticity usually expresses the mechanical strength and deformation capacity of hydrogel materials, specifically their stiffness or deformation resistance under tensile or compressive forces. It reflects the elastic recovery characteristics of hydrogel under external force and is a key parameter of hydrogel mechanical properties. The modulus of elasticity is defined using the following equation:

$$E = F/\sigma \quad (3)$$

Where  $F$  is the stress and  $\sigma$  is the strain corresponding to the selected stress. The modulus of elasticity is determined from the slope of the initial line of the stress-strain curve.

## Figures

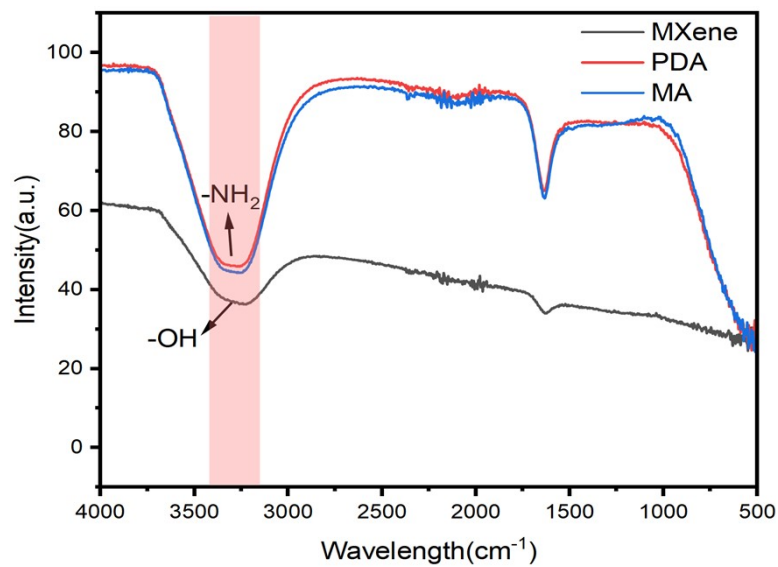

Figure S1. FTIR spectra of pure MXene, PDA, and the MA composite.

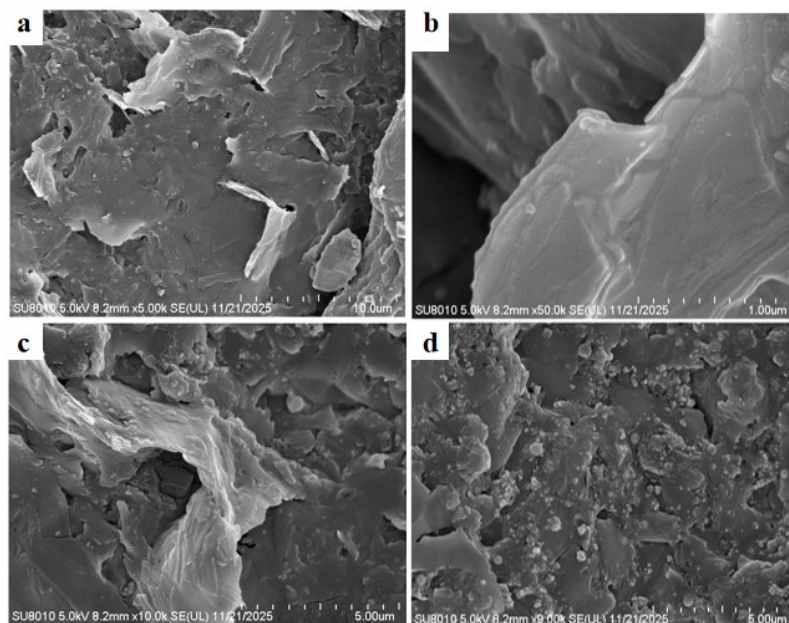

Figure S2. High-resolution FE-SEM images of the MA precursor solution at different magnifications.

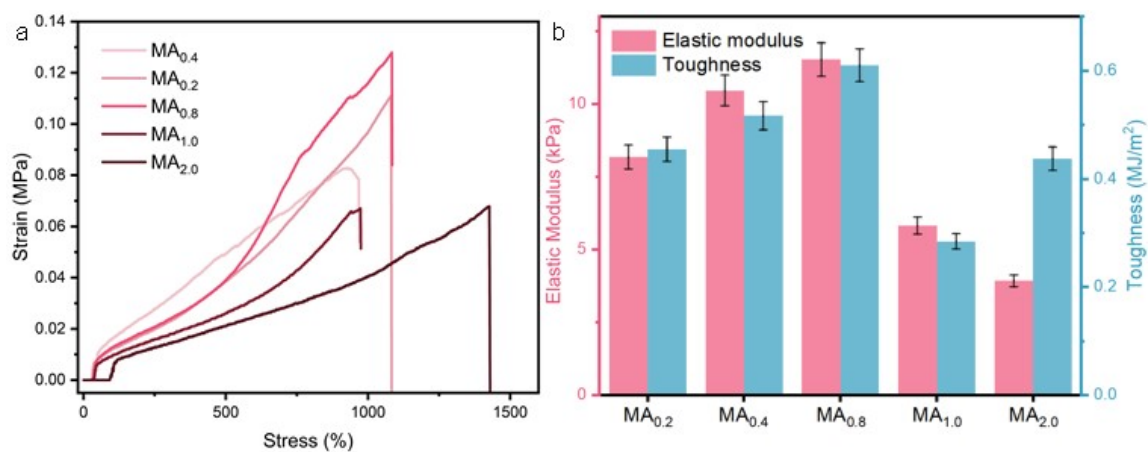

Figure S3. The mechanical properties of different hydrogel sample

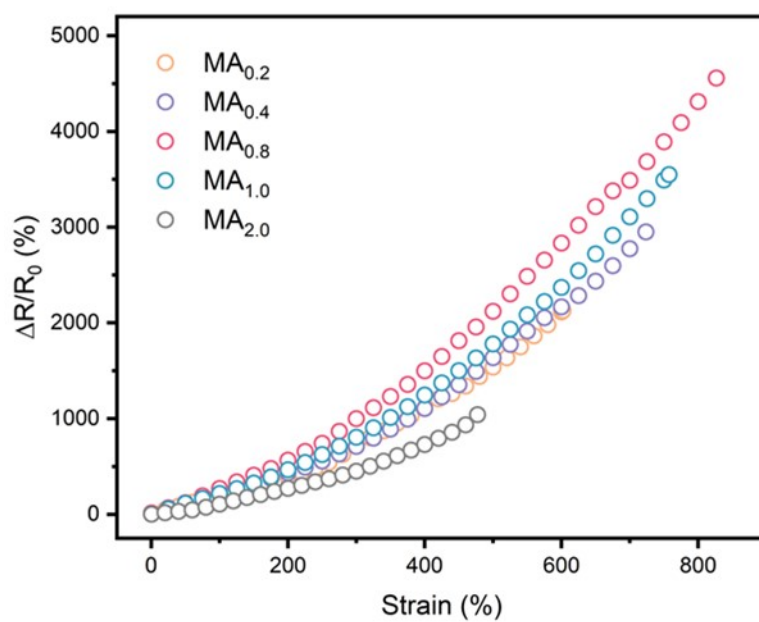

Figure S4. The mechanical properties of different hydrogel samples

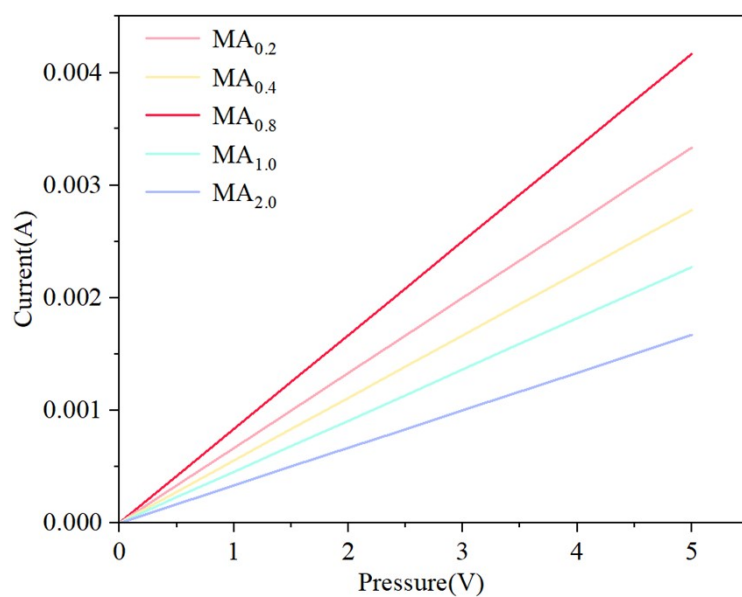

Figure S5. Current-voltage (I-V) characteristics of MAPS hydrogels with different MA contents (MA<sub>0.2</sub>, MA<sub>0.4</sub>, MA<sub>0.8</sub>, MA<sub>1.0</sub> and MA<sub>2.0</sub>) in the range of 0-5 V.

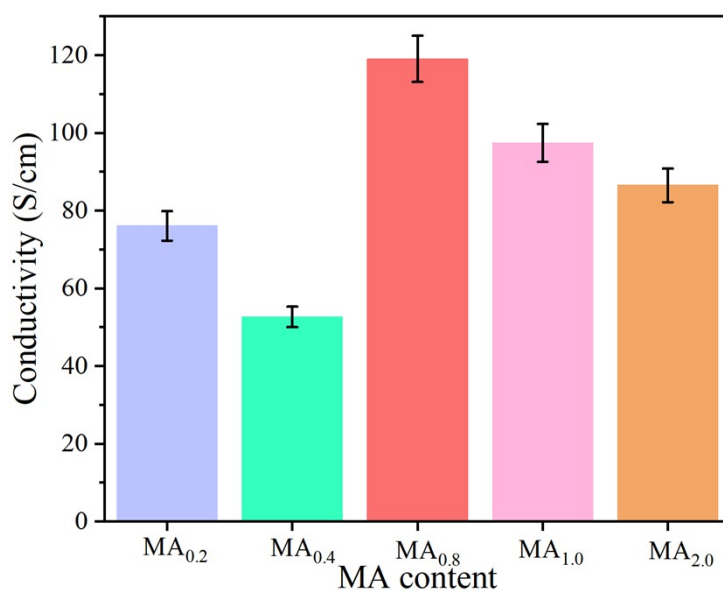

Figure S6. Conductivity of MAPS hydrogels with different MA contents (MA<sub>0.2</sub>, MA<sub>0.4</sub>, MA<sub>0.8</sub>, MA<sub>1.0</sub> and MA<sub>2.0</sub>) at room temperature.

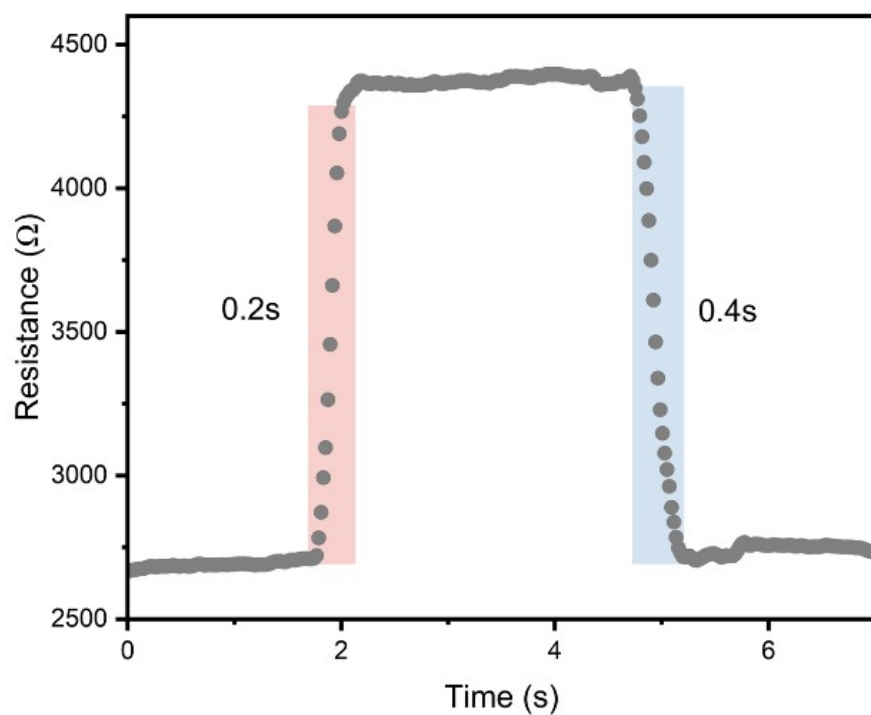

Figure S7. Response time and recovery time

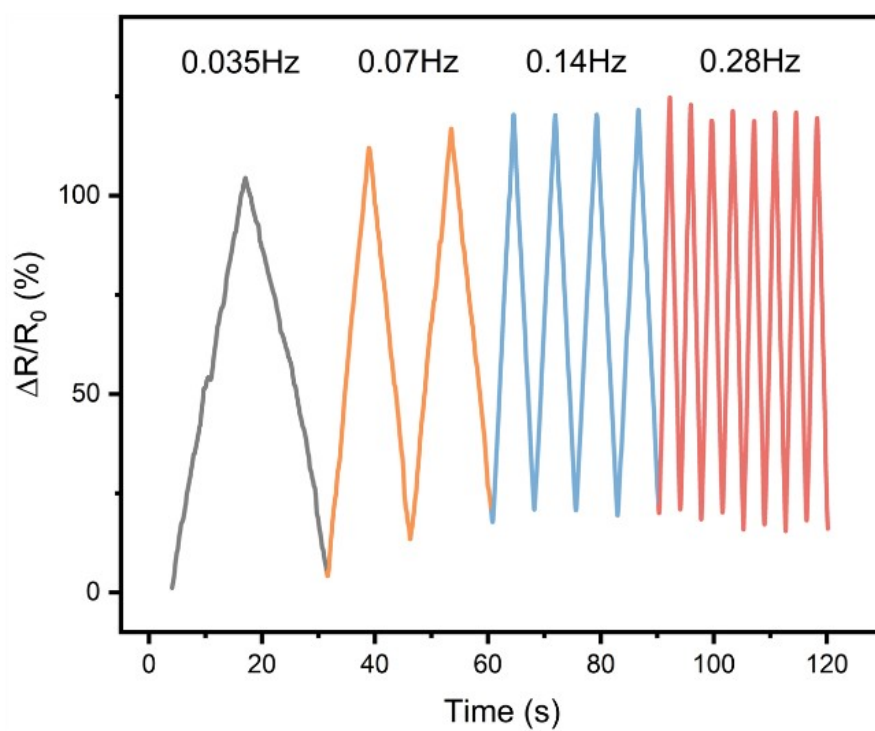

Figure S8. Tensile responses at different frequencies

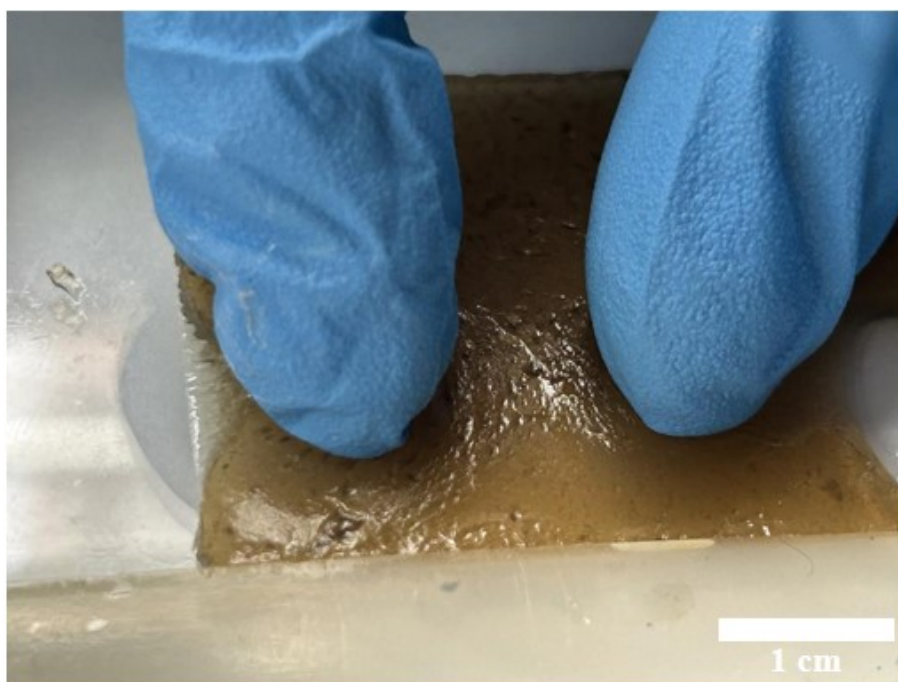

Figure S9. Optical image of hydrogel

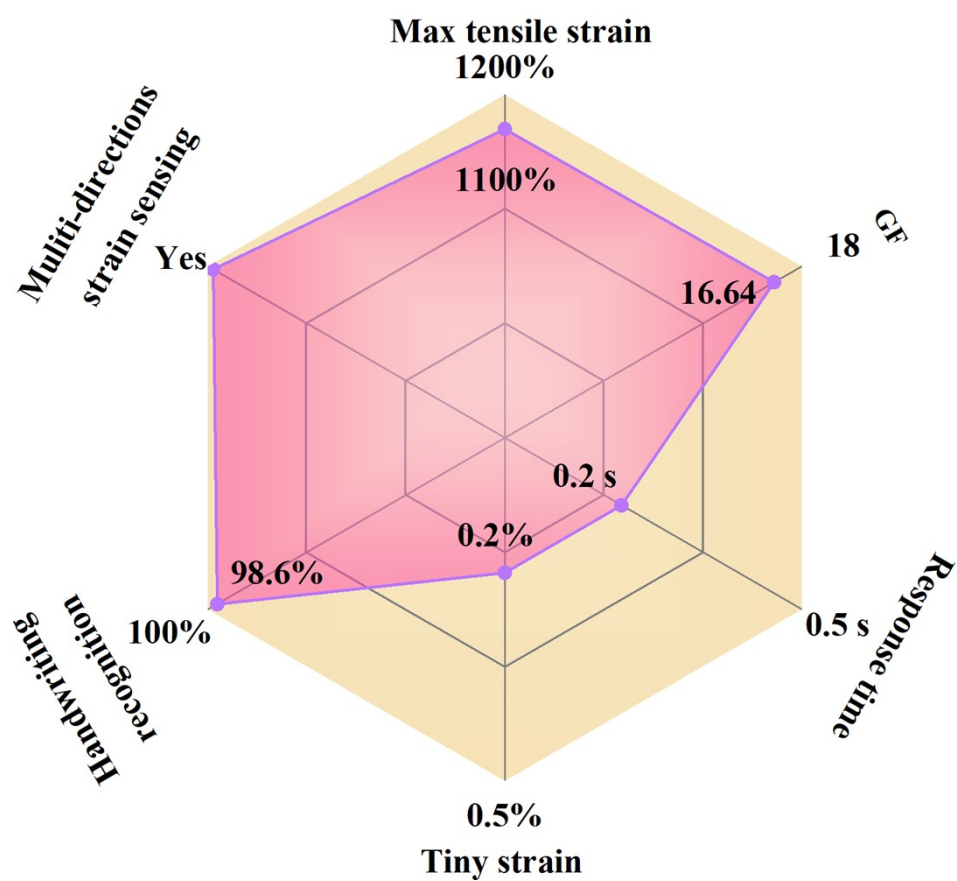

Figure S10. Radargram of the performance of MAPS hydrogel-based sensor



## Tables

Table S1 The comparison between MAPS hydrogel sensor and previous reported hydrogel sensors

| Component                               | Maximum<br>Gauge Factor | Tensile<br>strain (%) | Tiny<br>strain(%) | Handwriting<br>recognition | Multi-<br>directional<br>measuremen<br>t | Reference        |
|-----------------------------------------|-------------------------|-----------------------|-------------------|----------------------------|------------------------------------------|------------------|
| MAPS hydrogel                           | <b>16.64</b>            | <b>1100%</b>          | <b>0.2%</b>       | √                          | √                                        | <b>This work</b> |
| PVA/TA/Fe <sup>3+</sup> /MXene hydrogel | ×                       | 980%                  | ×                 | ×                          | ×                                        | [41]             |
| PVA/Fe <sup>3+</sup> /MXene             | 4.2                     | 850%                  | ×                 | ×                          | ×                                        | [42]             |
| PAM/PEDOT:PSS hydrogel                  | 5.3                     | 1000%                 | 0.5%              | ×                          | ×                                        | [43]             |
| PDA-CF-PAAm hydrogel                    | 2.67                    | 714%                  | ×                 | ×                          | ×                                        | [44]             |
| PDA-HC hydrogel                         | 4.18                    | 537%                  | 0.5%              | ×                          | ×                                        | [45]             |
| Ag-PDA/MAC                              | 4.18                    | 500%                  | 1%                | ×                          | ×                                        | [46]             |
| LM-CHCC                                 | 8.6                     | 428%                  | ×                 | ×                          | ×                                        | [47]             |
| PTCM-Glyx                               | 8.21                    | 675%                  | ×                 | ×                          | ×                                        | [48]             |
| MXene-PAA-ACC hydrogel                  | 10.79                   | 450%                  | 0.3%              | ×                          | ×                                        | [49]             |
| PACG-M hydrogel                         | 3.93                    | 896%                  | ×                 | ×                          | ×                                        | [50]             |
